# Supplementary material for: Chromosome-Level Genome Assembly of Papilio elwesi Leech, 1889 (Lepidoptera: Papilionidae)
Source: Insects. 2023 Mar 21;14(3):304. doi: 10.3390/insects14030304 (PMC10058580; doi:10.3390/insects14030304)
Supplement: Supplementary file 1 [file insects-14-00304-s001.zip]

Archive with 4 entries (4 files):
- Figure S1.pdf
- Figure S2.pdf
- Figure S3.pdf
- supplementary tables.xlsx
