# Supplementary material for: Chromosome-Level Genome Assembly of Papilio elwesi Leech, 1889 (Lepidoptera: Papilionidae)
Source: Insects. 2023 Mar 21;14(3):304. doi: 10.3390/insects14030304 (PMC10058580; doi:10.3390/insects14030304)
Supplement: Supplementary file 1 [file insects-14-00304-s001.zip › supplementary tables.xlsx]

## Sheet: Table S1
Table S1. Statistics of sequencing data used for genome assembly and annotation.
Libraries	Clean data (Gb)	Sequencing coverage (x)	N50 length (Kb)	Mean length	Platform
DNA PacBio HiFi	32.13	86	16.51	16607.25 bp	PacBio Sequel IIe
DNA Illumina (genome survey)	54.51	152	/	150 bp	Illumina NovaSeq 6000
DNA Hi-C	36.41	101	/	150 bp	Illumina NovaSeq 6000
RNA Illumina	11.58	/	/	150 bp	Illumina NovaSeq 6000
RNA ONT	12.61	/	1.45	1106.86 bp	PromethION
Total	147.24	339	/	/	/

## Sheet: Table S2
Table S2. Genome assembly statistics of three Papilionidae species.
Genome assembly	Papilio elwesi	Papilio machaon (GCA_912999745.1)	Iphiclides podalirius (GCA_933534255.1 )
Assembly size (Mb)	358.51	252.11	430.73
Number of scaffolds/contigs	147/207	33/37	260/446
Longest scaffold/contig (Mb)	20.18/15.81	11.24/11.24	21.05/12.07
N50 scaffold/contig length (Mb)	12.32/6.79	8.78/8.64	15.09/5.18
GC	0.3708	0.3452	0.3657
Gaps	2e-05	0	0.00021
BUSCO completeness	0.99	0.99	0.97

## Sheet: Table S3
Table S3. The coverage of the 31 chromosomes.
Chromosome	Coverage (x)
Pelw_ChrZ	45.86
Pelw_Chr14	90.61
Pelw_Chr15	89.51
Pelw_Chr06	89.79
Pelw_Chr18	91.97
Pelw_Chr20	89.06
Pelw_Chr22	90.73
Pelw_Chr28	124.25
Pelw_Chr04	97.34
Pelw_Chr12	93.32
Pelw_Chr17	90.42
Pelw_Chr03	89.36
Pelw_Chr19	92.14
Pelw_Chr29	117.27
Pelw_Chr21	88.52
Pelw_Chr13	90.86
Pelw_Chr10	90.52
Pelw_Chr26	89.51
Pelw_Chr27	100.49
Pelw_Chr25	101.36
Pelw_Chr05	91.22
Pelw_Chr16	99.87
Pelw_Chr11	97.43
Pelw_Chr02	91.24
Pelw_Chr01	89.59
Pelw_Chr07	91.83
Pelw_Chr24	103.95
Pelw_Chr23	90.16
Pelw_Chr08	89.5
Pelw_Chr09	92.83
Pelw_Chr30	132.09

## Sheet: Table S4
Table S4. Annotation of repetitive elements in the Papilio elwesi genome.
Class	Copies	Length (bp)	Percentage of the genome (bp)
DNA	9689	985548	0.0027
Academ-1	4571	523443	0.0015
Academ-2	2	104	0
Academ-H	3	282	0
CMC	1	89	0
CMC-Chapaev	79	3313	0
CMC-Chapaev-3	76	16125	0
CMC-EnSpm	1018	65263	0.0002
CMC-Transib	90	5518	0
Crypton	11	414	0
Crypton-A	4	275	0
Crypton-C	6	553	0
Crypton-F	4	188	0
Crypton-H	50	1941	0
Crypton-S	11	993	0
Crypton-V	108	5378	0
Crypton-X	1	61	0
Dada	102	5965	0
Ginger-1	81	3976	0
Ginger-2	71	9386	0
IS3EU	58	5841	0
Kolobok	6	218	0
Kolobok-E	7	484	0
Kolobok-H	3	161	0
Kolobok-Hydra	27	1578	0
Kolobok-T2	254	119263	0.0003
MULE	1	52	0
MULE-F	3	123	0
MULE-MuDR	633	53533	0.0001
MULE-NOF	36	2710	0
MULE-Ricksha	6	377	0
Maverick	307	18442	0.0001
Maverick-Mavirus	2	108	0
Merlin	8403	1569289	0.0044
Novosib	21	2719	0
P	340	54651	0.0002
P-Fungi	3	149	0
PIF-HarbS	1	37	0
PIF-Harbinger	934	506374	0.0014
PIF-ISL2EU	41	2314	0
PIF-Spy	43	2285	0
PiggyBac	6763	785418	0.0022
PiggyBac-X	3	190	0
Sola-1	46	2154	0
Sola-2	46	2600	0
Sola-3	28	3855	0
TcMar	24	1287	0
TcMar-Ant1	6	639	0
TcMar-Cweed	3	215	0
TcMar-Fot1	119	8446	0
TcMar-ISRm11	69	8930	0
TcMar-Mariner	5301	1083404	0.003
TcMar-Mogwai	2	92	0
TcMar-Pogo	24	1673	0
TcMar-Sagan	9	453	0
TcMar-Stowaway	15	638	0
TcMar-Tc1	3377	1740896	0.0049
TcMar-Tc2	41	16416	0
TcMar-Tc4	31	1470	0
TcMar-Tigger	442	84397	0.0002
TcMar-m44	17	1754	0
Zator	36	4866	0
Zisupton	168	7691	0
hAT	3666	345530	0.001
hAT-Ac	3239	409757	0.0011
hAT-Blackjack	97	11265	0
hAT-Charlie	2995	458588	0.0013
hAT-Pegasus	35	3159	0
hAT-Tag1	59	3207	0
hAT-Tip100	1837	198052	0.0006
hAT-hAT1	2	69	0
hAT-hAT19	9	608	0
hAT-hAT5	6	378	0
hAT-hAT6	2	108	0
hAT-hATm	67	3810	0
hAT-hATw	7	245	0
hAT-hATx	6	396	0
hAT-hobo	26	1617	0
LINE	35	28608	0.0001
CR1	5200	1536326	0.0043
CR1-Zenon	100357	20281727	0.0566
CRE	35	2785	0
CRE-Ambal	4	216	0
CRE-Odin	13	554	0
Deceiver	1	36	0
Dong-R4	3473	1047760	0.0029
Dualen	5	229	0
I	860	346913	0.001
I-Jockey	13633	3796047	0.0106
L1	668	34315	0.0001
L1-DRE	3	225	0
L1-Tx1	237	17383	0
L1-Zorro	1	72	0
L2	6629	1822207	0.0051
Penelope	9041	1189912	0.0033
Proto1	7	384	0
Proto2	979	325714	0.0009
R1	12523	11900730	0.0332
R1-LOA	3146	557009	0.0016
R2	78	7183	0
R2-Hero	7	441	0
R2-NeSL	16	1050	0
RTE	1436	538835	0.0015
RTE-BovB	59394	10874074	0.0303
RTE-ORTE	2	91	0
RTE-RTE	17829	3030345	0.0085
RTE-X	118	26062	0.0001
Rex-Babar	31	1634	0
Tad1	36	2011	0
LTR	417	49345	0.0001
Caulimovirus	102	6525	0
Copia	1334	216581	0.0006
DIRS	884	168595	0.0005
DIRS-Q	2	46	0
ERV-Foamy	3	139	0
ERV-Lenti	2	70	0
ERV1	391	21297	0.0001
ERV4	24	1386	0
ERVK	261	16195	0
ERVL	32	1619	0
ERVL-MaLR	8	430	0
Gypsy	7294	11038677	0.0308
Ngaro	81	10730	0
Pao	1529	466439	0.0013
Other	--	--	--
DNA_virus	3	154	0
RC	--	--	--
Helitron	118940	18086631	0.0504
Helitron-2	3	61	0
Retroposon	155	19923	0.0001
I-derived	1	36	0
L1-dep	11	487	0
L2-derived	2	122	0
RTE-derived	1	47	0
sno	1	15	0
sno-L1	1	70	0
SINE	13557	1042070	0.0029
5S	1	29	0
5S-RTE	4	166	0
5S-Sauria-RTE	12	1050	0
7SL	3	841	0
Alu	8	329	0
B2	4	82	0
B4	13	664	0
ID	19	613	0
MIR	2	118	0
U	2	132	0
U-L1	22	1845	0
tRNA	11337	1784262	0.005
tRNA-5S	1	67	0
tRNA-CR1	15	817	0
tRNA-Core	8	501	0
tRNA-Core-RTE	1	14	0
tRNA-Deu	1	121	0
tRNA-Deu-I	1	103	0
tRNA-Deu-L2	3	292	0
tRNA-Deu-RTE	8	358	0
tRNA-I	1	111	0
tRNA-L2	5	322	0
tRNA-Meta	3	64	0
tRNA-R2	1	17	0
tRNA-RTE	6504	1247261	0.0035
tRNA-V	5	167	0
Unknown	151410	19960037	0.0557
centromeric	2	124	0
Total_interspersed	605962	120682871	0.3366
Low_complexity	10855	502656	0.0014
Satellite	10787	1601586	0.0045
acro	1	8	0
centr	1	144	0
macro	4	86	0
Simple_repeat	66751	8697369	0.0243
rRNA	505	462632	0.0013
scRNA	1	76	0
snRNA	28	3587	0
srpRNA	3	619	0
tRNA	585	37088	0.0001
Total	695483	131988722	0.3682

## Sheet: Table S5
Table S5. Annotation of non-coding RNAs in the Papilio elwesi genome.
Class	Copies	Description
rRNA
5_8S_rRNA	44	rRNA	5.8S ribosomal RNA
5S_rRNA	162	rRNA	5S ribosomal RNA
LSU_rRNA_archaea	2	rRNA	Archaeal large subunit ribosomal RNA
LSU_rRNA_eukarya	81	rRNA	Eukaryotic large subunit ribosomal RNA
SSU_rRNA_eukarya	44	rRNA	Eukaryotic small subunit ribosomal RNA
SSU_rRNA_microsporidia	24	rRNA	Microsporidia small subunit ribosomal RNA
miRNA
bantam	1	miRNA	microRNA bantam
mir-1	1	miRNA	mir-1 microRNA precursor family
mir-10	2	miRNA	mir-10 microRNA precursor family
mir-11	1	miRNA	mir-11 microRNA precursor family
mir-1175	1	miRNA	mir-1175 microRNA precursor family
mir-124	1	miRNA	mir-124 microRNA precursor family
mir-133	1	miRNA	mir-133 microRNA precursor family
mir-137	1	miRNA	microRNA mir-137
mir-14	1	miRNA	microRNA mir-14
mir-184	1	miRNA	microRNA mir-184
mir-190	1	miRNA	microRNA mir-190
mir-2	3	miRNA	mir-2 microRNA precursor
mir-210	2	miRNA	microRNA mir-210
mir-252	1	miRNA	microRNA mir-252
mir-263	2	miRNA	microRNA mir-263
mir-274	1	miRNA	microRNA mir-274
mir-275	1	miRNA	microRNA mir-275
mir-2755	1	miRNA	mir-2755 microRNA precursor family
mir-2756	1	miRNA	mir-2756 microRNA precursor family
mir-276	1	miRNA	microRNA mir-276
mir-2763	1	miRNA	mir-2763 microRNA precursor family
mir-2765	1	miRNA	mir-2765 microRNA precursor family
mir-277	1	miRNA	microRNA mir-277
mir-278	1	miRNA	microRNA mir-278
mir-2788	1	miRNA	mir-2788 microRNA precursor family
mir-2814	3	miRNA	mir-2814 microRNA precursor family
mir-282	1	miRNA	microRNA mir-282
mir-283	1	miRNA	microRNA mir-283
mir-2830	2	miRNA	mir-2830 microRNA precursor family
mir-2834	1	miRNA	mir-2834 microRNA precursor family
mir-305	1	miRNA	microRNA mir-305
mir-31	1	miRNA	microRNA mir-31
mir-317	1	miRNA	microRNA mir-317
mir-33	1	miRNA	microRNA mir-33
mir-3327	1	miRNA	mir-3327 microRNA precursor family
mir-3338	1	miRNA	mir-3338 microRNA precursor family
mir-3389	27	miRNA	mir-3389 microRNA precursor family
mir-449	1	miRNA	microRNA mir-449
mir-46	1	miRNA	mir-46/mir-47/mir-281 microRNA precursor family
mir-67	1	miRNA	microRNA mir-67
mir-7	1	miRNA	mir-7 microRNA precursor
mir-71	1	miRNA	microRNA mir-71
mir-745	1	miRNA	mir-745 microRNA precursor family
mir-750	1	miRNA	mir-750 microRNA precursor family
mir-8	2	miRNA	mir-8/mir-141/mir-200 microRNA precursor family
mir-9	2	miRNA	mir-9/mir-79 microRNA precursor family
mir-927	2	miRNA	microRNA mir-927
mir-929	1	miRNA	microRNA mir-929
mir-932	1	miRNA	microRNA mir-932
mir-965	1	miRNA	mir-965 microRNA precursor family
mir-970	1	miRNA	mir-970 microRNA precursor family
mir-971	1	miRNA	mir-971 microRNA precursor family
mir-981	1	miRNA	microRNA mir-981
mir-998	1	miRNA	mir-998 microRNA precursor family
mir-iab-4	1	miRNA	mir-iab-4 microRNA precursor family
snRNA
snoMe18S-Um1356	1	snRNA; snoRNA; CD-box	Small nucleolar RNA Me18S-Um1356
SNORA53	1	snRNA; snoRNA; HACA-box	Small nucleolar RNA SNORA53
SNORD31	3	snRNA; snoRNA; CD-box	Small nucleolar RNA SNORD31
SNORD36	1	snRNA; snoRNA; CD-box	Small nucleolar RNA SNORD36
snosnR60_Z15	2	snRNA; snoRNA; CD-box	Small nucleolar RNA snR60/Z15/Z230/Z193/J17
snosnR61	1	snRNA; snoRNA; CD-box	Small nucleolar RNA snR61/Z1/Z11
U1	8	snRNA; splicing	U1 spliceosomal RNA
U11	1	snRNA; splicing	U11 spliceosomal RNA
U12	1	snRNA; splicing	U12 minor spliceosomal RNA
U2	11	snRNA; splicing	U2 spliceosomal RNA
U3	13	snRNA; snoRNA; CD-box	Small nucleolar RNA U3
U4	4	snRNA; splicing	U4 spliceosomal RNA
U4atac	1	snRNA; splicing	U4atac minor spliceosomal RNA
U5	9	snRNA; splicing	U5 spliceosomal RNA
U6	16	snRNA; splicing	U6 spliceosomal RNA
U6atac	3	snRNA; splicing	U6atac minor spliceosomal RNA
lncRNA
Sphinx_1	1	lncRNA	Sphinx_ conserved region 1
Sphinx_2	1	lncRNA	Sphinx conserved region 2
ribozyme
RNase_MRP	2	ribozyme	RNase MRP
RNaseP_nuc	3	ribozyme	Nuclear RNase P
tRNA
tRNA-Ala	50	tRNA
tRNA-Arg	46	tRNA
tRNA-Asn	32	tRNA
tRNA-Asp	26	tRNA
tRNA-Cys	13	tRNA
tRNA-Gln	25	tRNA
tRNA-Glu	37	tRNA
tRNA-Gly	47	tRNA
tRNA-His	15	tRNA
tRNA-Ile	36	tRNA
tRNA-iMet	15	tRNA
tRNA-Leu	51	tRNA
tRNA-Lys	50	tRNA
tRNA-Met	16	tRNA
tRNA-Phe	16	tRNA
tRNA-Pro	32	tRNA
tRNA-Ser	51	tRNA
tRNA-Thr	33	tRNA
tRNA-Trp	17	tRNA
tRNA-Tyr	22	tRNA
tRNA-Val	39	tRNA
Others
Histone3	83	Histone 3' UTR stem-loop
IBV_D-RNA	1	Infectious bronchitis virus D-RNA
IRE_II	1	Iron response element II
K_chan_RES	4	Potassium channel RNA editing signal
Metazoa_SRP	6	Metazoan signal recognition particle RNA
Total	1296

## Sheet: Table S6
Table S6. Summary statistics of structural and functional annotations in the Papilio elwesi genome.
Structure annotation
Number of protein-coding genes	13681
Number of predicted protein sequences	17611
Mean protein length (aa)	571.7
Mean gene length (bp)	8529.8
Gene ratio	0.3255
Number of exons per gene	7.4
Mean exon length (bp)	332.3
Exon ratio	0.0946
Number of CDSs per gene	7.2
Mean CDS length (bp)	221.3
CDS ratio	0.0614
Number of introns per gene	6.4
Mean intron length (bp)	1003.9
Intron ratio	23.09% (24.57%)
Function annotation
Number of genes matching Uniprot records	13442
Number of genes labelled as "Uncharacterized protein"	2096
Number of genes labelled as "unknown function"	253
Number of genes with InterProScan annotations	11414
Number of genes with GO items from InterProScan annotations	7376
Number of genes with KEGG pathway items from InterProScan annotations	0
Number of genes with MetaCyc items from InterProScan annotations	7655
Number of genes with Reactome items from InterProScan annotations	9798
Number of genes with eggNOG annotations	13042
Number of genes with GO items from eggNOG annotations	8626
Number of genes with Enzyme Codes (EC) from eggNOG annotations	2904
Number of genes with KEGG ko terms from eggNOG annotations	7956
Number of genes with KEGG pathway terms from eggNOG annotations	4995
Number of genes with COG Functional Categories from eggNOG annotations	11457
Number of genes with GO items (combining InterProScan and eggNOG results)	10282
Number of genes with KEGG pathways items (combining InterProScan and eggNOG results)	4995

## Sheet: Table S7
Table S7. Statistics of gene family among 11 selected species.
Number of species	11
Number of genes	156231
Number of genes in orthogroups	150006
Number of unassigned genes	6225
Percentage of genes in orthogroups	96
Percentage of unassigned genes	4
Number of orthogroups	14488
Number of species-specific orthogroups	1524
Number of genes in species-specific orthogroups	5891
Percentage of genes in species-specific orthogroups	3.8
Mean orthogroup size	10.4
Median orthogroup size	11
G50 (assigned genes)	11
G50 (all genes)	11
O50 (assigned genes)	5013
O50 (all genes)	5296
Number of orthogroups with all species present	7650
Number of single-copy orthogroups	3891

## Sheet: Table S8
Table S8. Gene counts for each species.
	Aricia_agestis	Bombyx_mori	Danaus_plexippus	Papilio_bianor	Papilio_elwesi	Papilio_glaucus	Papilio_machaon	Papilio_polytes	Papilio_xuthus	Pieris_rapae	Spodoptera_frugiperda
Number of genes	12987	13866	13105	15375	13681	15685	13379	12165	15131	12147	18710
Number of genes in orthogroups	12758	13534	12844	13114	13411	13986	13311	11991	14846	12037	18174
Number of unassigned genes	229	332	261	2261	270	1699	68	174	285	110	536
Percentage of genes in orthogroups	98.2	97.6	98	85.3	98	89.2	99.5	98.6	98.1	99.1	97.1
Percentage of unassigned genes	1.8	2.4	2	14.7	2	10.8	0.5	1.4	1.9	0.9	2.9
Number of orthogroups containing species	10721	11101	10960	10615	11499	11174	11166	10715	11949	10655	11423
Percentage of orthogroups containing species	74	76.6	75.6	73.3	79.4	77.1	77.1	74	82.5	73.5	78.8
Number of species-specific orthogroups	73	98	63	103	38	90	14	6	605	35	399
Number of genes in species-specific orthogroups	355	599	217	739	113	196	46	37	1755	220	1614
Percentage of genes in species-specific orthogroups	2.7	4.3	1.7	4.8	0.8	1.2	0.3	0.3	11.6	1.8	8.6

## Sheet: Table S9
Table S9. Gene family evolution of 11 species inferred from CAFE.
Species	Expanded fams	Genes gained	genes/expansion	Contracted fams	Genes lost	genes/contraction	No change	Avg. Expansion	Sig Expansions	Sig Contractions	Total Sig Changes
Danaus plexippus	864	1230	1.42	776	939	1.21	12848	0.0200856	30	29	59
Bombyx mori	547	1570	2.87	3651	3735	1.02	10290	-0.149434	59	4	63
Papilio polytes	306	406	1.33	1145	1225	1.07	13037	-0.0565295	35	34	69
Papilio bianor	610	1709	2.8	1311	1405	1.07	12567	0.0209829	144	47	191
Aricia agestis	472	1321	2.8	1049	1116	1.06	12967	0.0141496	84	6	90
Papilio glaucus	1440	1829	1.27	1226	1281	1.04	11822	0.0378244	103	32	135
Pieris rapae	343	722	2.1	1303	1444	1.11	12842	-0.0498343	29	17	46
Papilio elwesi	621	895	1.44	863	922	1.07	13004	-0.00186361	77	27	104
Spodoptera frugiperda	3494	5692	1.63	3174	3217	1.01	7820	0.170831	136	3	139
Papilio xuthus	1100	1881	1.71	565	602	1.07	12823	0.08828	364	26	390
Papilio machaon	387	1085	2.8	1324	1341	1.01	12777	-0.0176698	118	12	130

## Sheet: Table S10
Table S10. Statistics of significantly expanded gene families in Papilio elwesi, excluding families lacking functional annotation.
Orthogroups	number	function
OG0000028	87	Baculovirus FP protein
OG0000041	42	Reverse transcriptase (RNA-dependent DNA polymerase)
OG0000121	26	Endonuclease
OG0000043	18	Acyltransferase family
OG0000076	17	Cuticular protein
OG0001029	15	Chitin-binding type-2 domain-containing protein
OG0000075	14	Glutathione S-transferase
OG0000656	13	Ubiquitin-conjugating enzyme
OG0000148	12	short chain dehydrogenase
OG0000213	11	Trypsin
OG0000432	9	Farnesyl pyrophosphate synthase
OG0004572	8	Gustatory receptor
OG0000101	8	Organic cation transporter protein
OG0000116	8	PBP/GOBP family
OG0000127	8	Transposase IS4
OG0000386	7	Aminoacylase-1
OG0000210	7	Cecropin family
OG0000554	7	DNA replication licensing factor
OG0000645	7	Ecotropic viral integration site 5 ortholog
OG0000345	7	FLYWCH zinc finger domain
OG0000172	7	Insect cuticle protein
OG0004507	6	3'5'-cyclic nucleotide phosphodiesterase
OG0000255	5	Alkaline nuclease
OG0008996	5	Chaetoglobosin A biosynthesis cluster protein
OG0011801	5	Chromosome-associated kinesin
OG0000169	5	Cytochrome P450
OG0011500	5	Myrosinase
OG0000129	5	Odorant receptor
OG0000446	5	Proline--tRNA ligase
OG0010725	5	SOSS complex subunit B homolog
OG0010298	5	THAP-type domain-containing protein
OG0000033	4	Pao retrotransposon peptidase
OG0011493	4	Replication factor C subunit
OG0007519	4	Retrovirus-related Pol polyprotein from transposon
OG0000803	4	TIL domain-containing protein
OG0000321	4	Transcription activator MBF2
OG0000773	3	Eukaryotic translation initiation factor
OG0011766	3	Fructose-bisphosphate aldolase
OG0012168	3	Histone deacetylase
OG0012204	3	Protein max
OG0010303	3	Ribonucleoside-diphosphate reductase large chain
OG0000781	3	U3 small nucleolar ribonucleoprotein protein
